# Supplementary material for: Rheological analysis of oil–water emulsions stabilized with clay particles by LAOS and interfacial shear moduli measurements
Source: Springer Nature journal article supplement (doi:10.1007/s00397-019-01144-0), 2019-04-15
Supplement: MOESM1 [file 16658318]

**Rheological Analysis of Oil-Water Emulsions Stabilized with Clay Particles by LAOS and Interfacial Shear Moduli Measurements**

JOUNG SOOK HONG et al.

**Supplementary Figures**

**30/70 (O/W) emulsion**


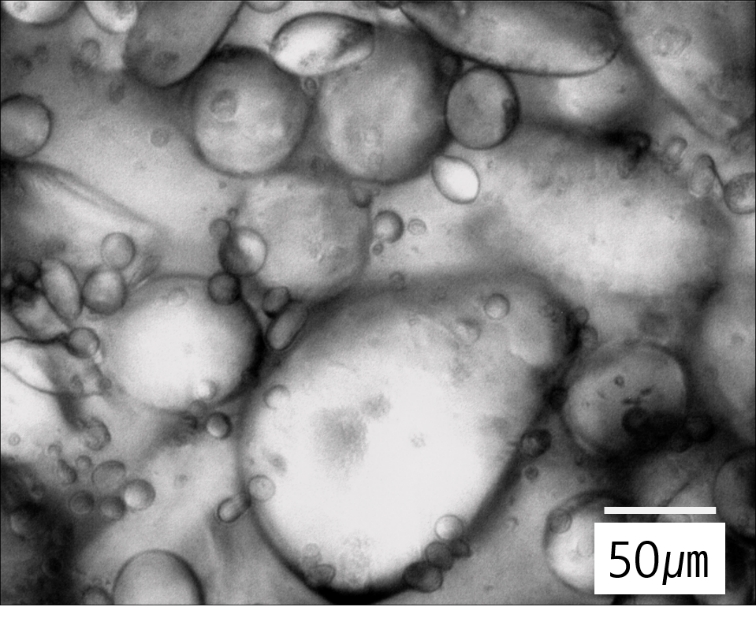

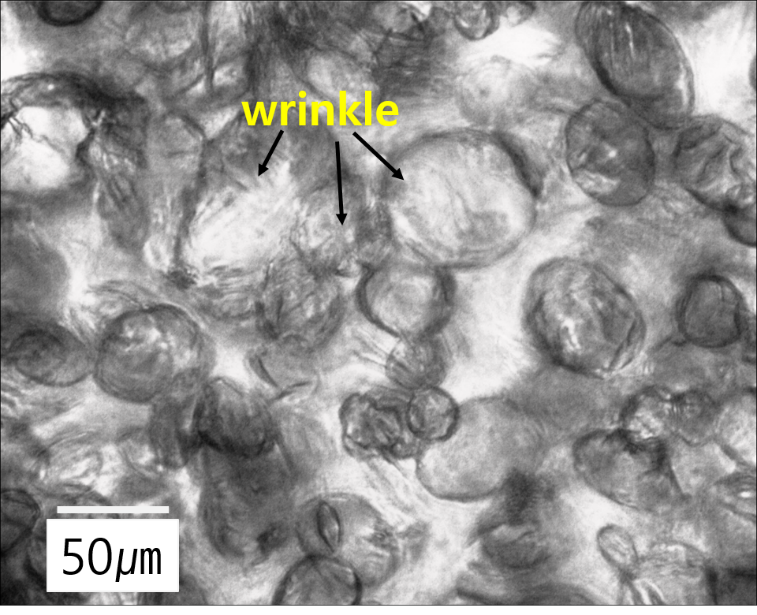


**40/60 (O/W) emulsion**

Fig. S1 Microscope image of 30/70 (O/W) (top) and 40/60 (O/W) emulsion (bottom) with NMT/OMT 6000 ppm


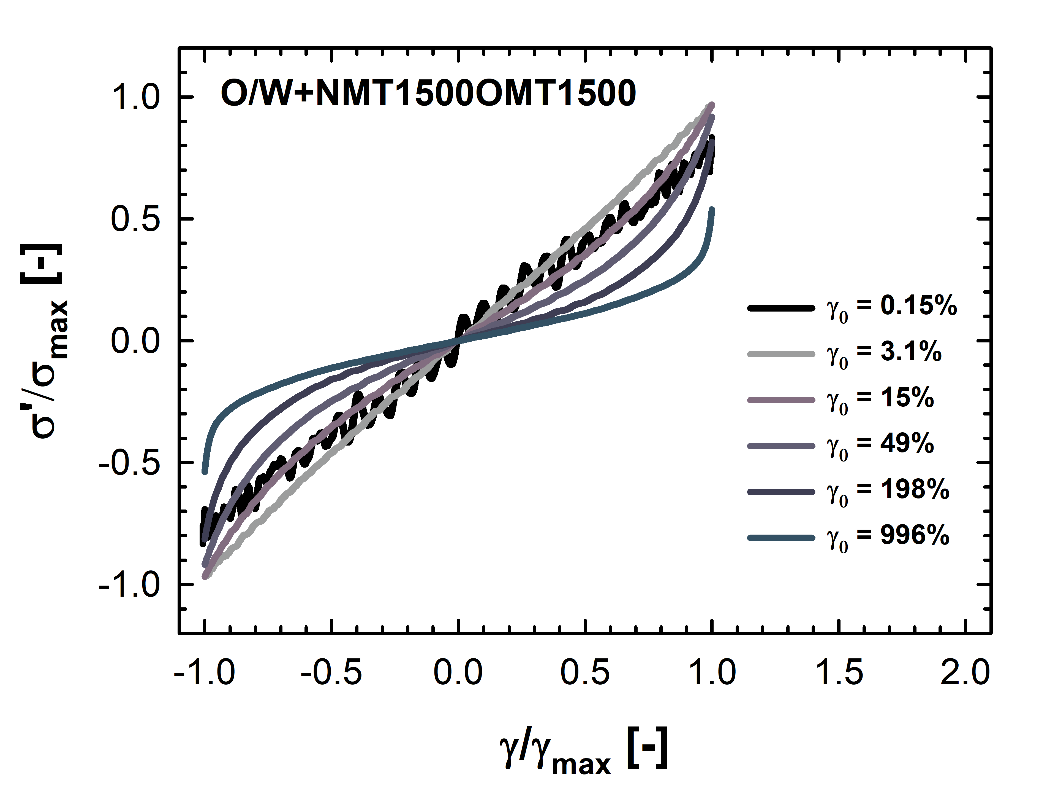

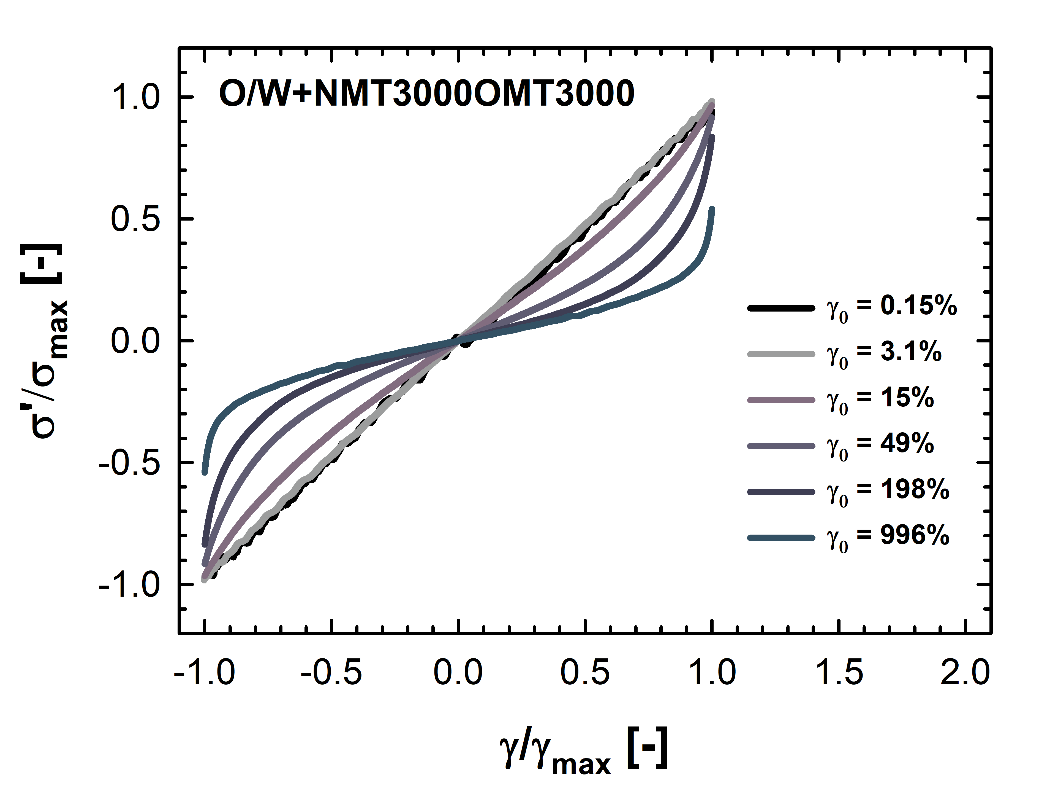

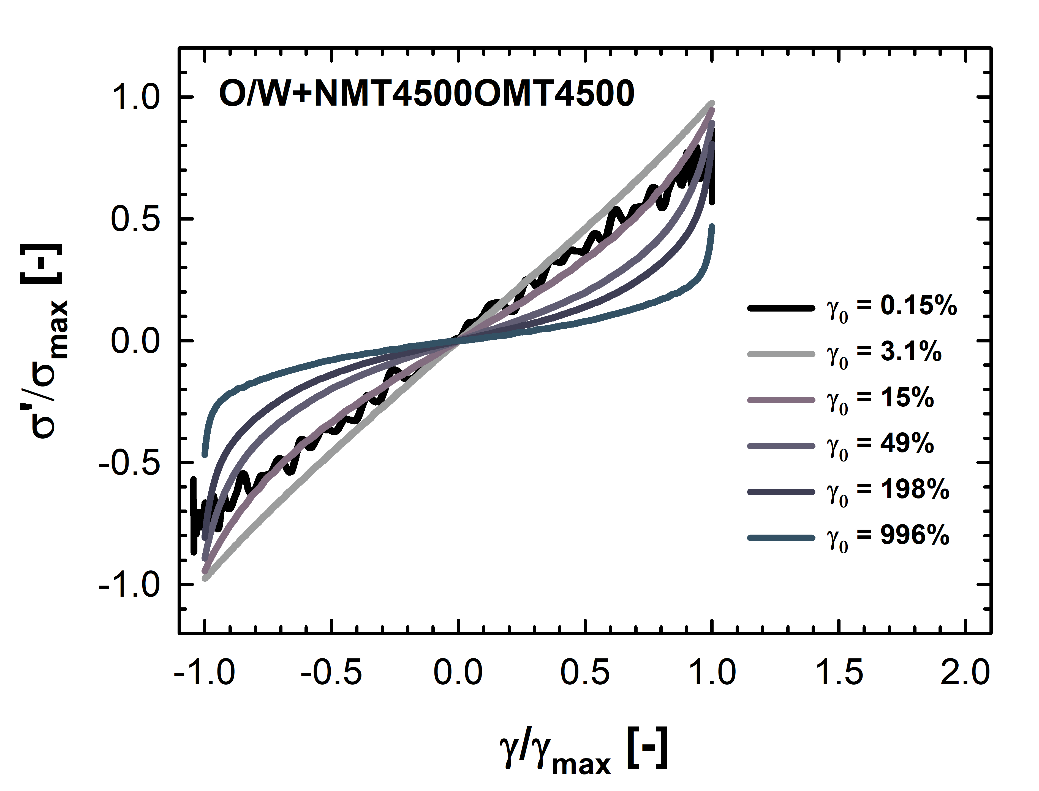

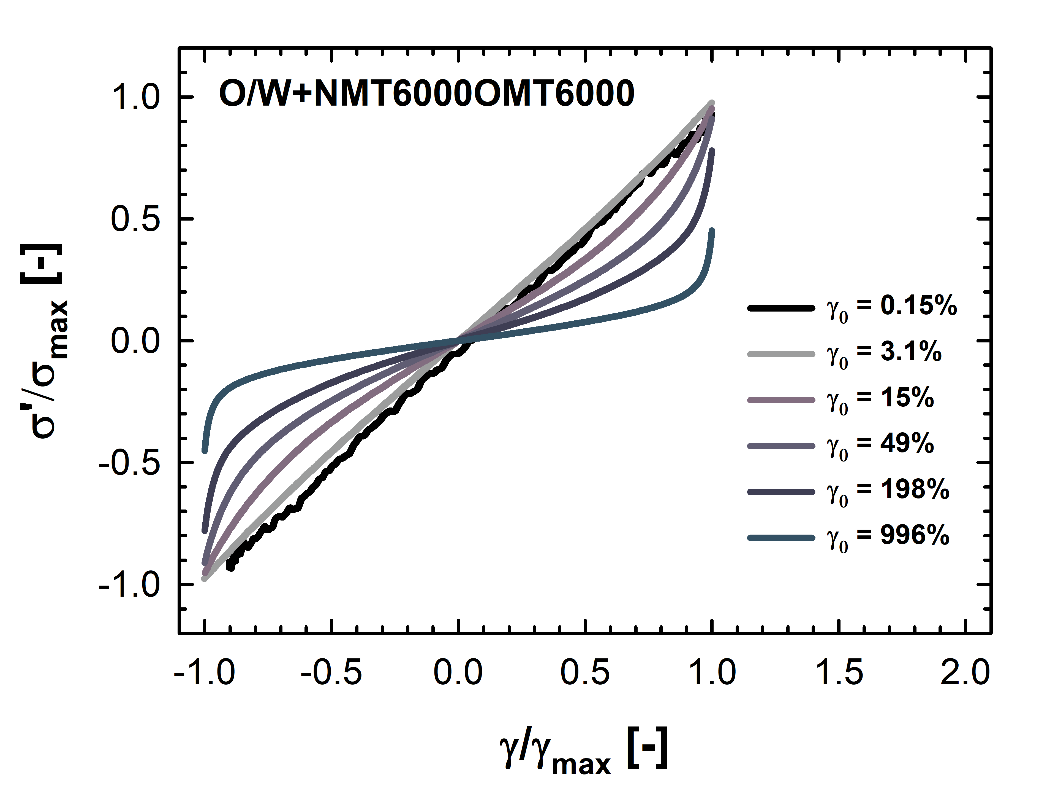


Fig. S2a Comparison of elastic shear stress versus strain (which are normalized with maximum stress or strain) of the emulsions with NMT/OMT at strain amplitudes


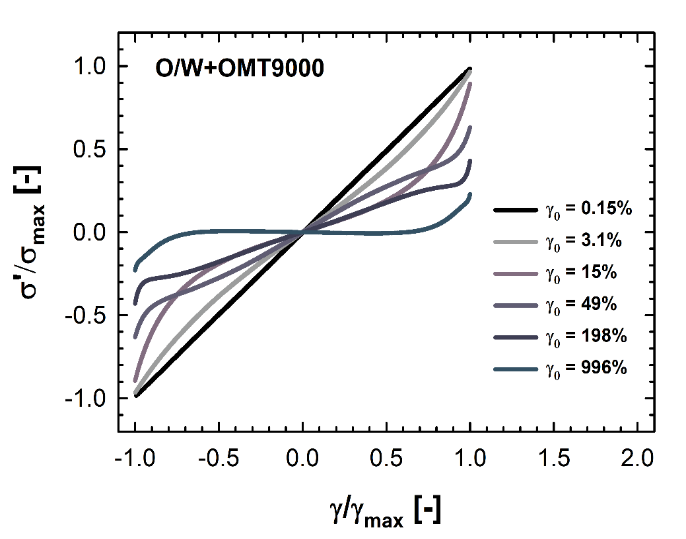

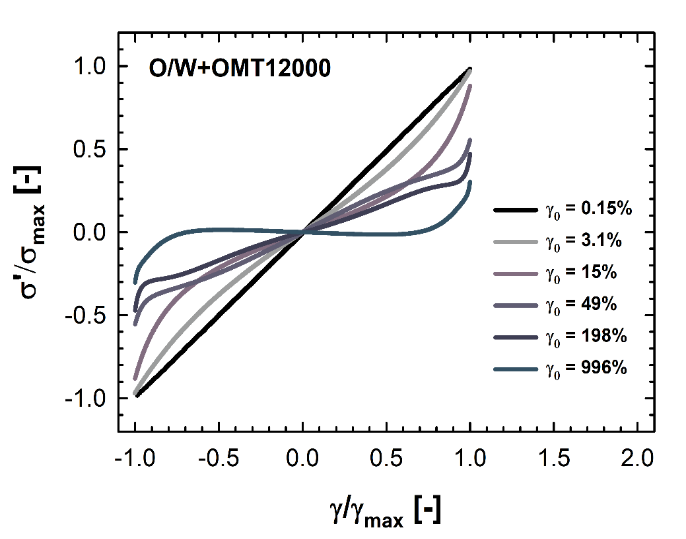

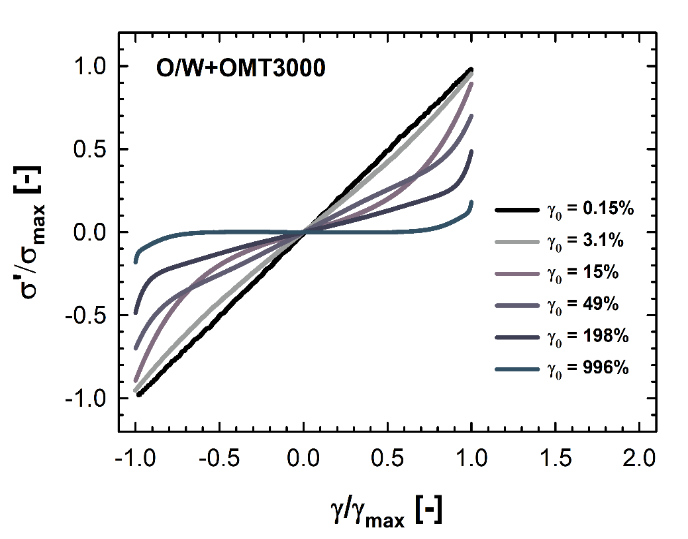

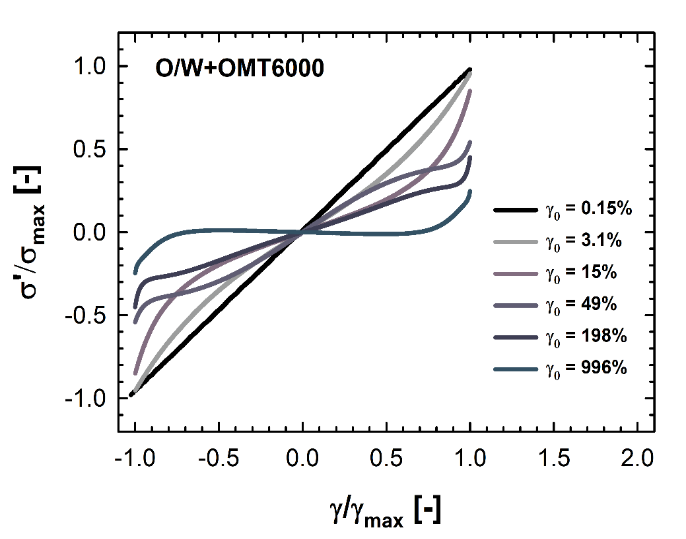


Fig. S2b Comparison of elastic shear stress versus strain (which are normalized with maximum stress or strain) of the emulsions with OMT at strain amplitudes
